# Supplementary material
Source: PubMed Central journal article supplement (PMC2775833)
Supplement: mmc1.pdf [file mmc1.pdf]

Supplemental Data

*AJHG*, Volume 85

**Recessive Mutations of the Gene *TRPM1* Abrogate  
ON Bipolar Cell Function and Cause Complete  
Congenital Stationary Night Blindness in Humans**

Zheng Li, Panagiotis I. Sergouniotis, Michel Michaelides, Donna S Mackay, Genevieve A Wright, Sophie Devery, Anthony T. Moore, Graham E. Holder, Anthony G. Robson, and Andrew R. Webster

**Figure S1. Positions of Rare Missense Variants Found in this Study and Their Context within Partial Alignments of TRPM1 Orthologues as well as Human TRP Channel Protein Paralogs**

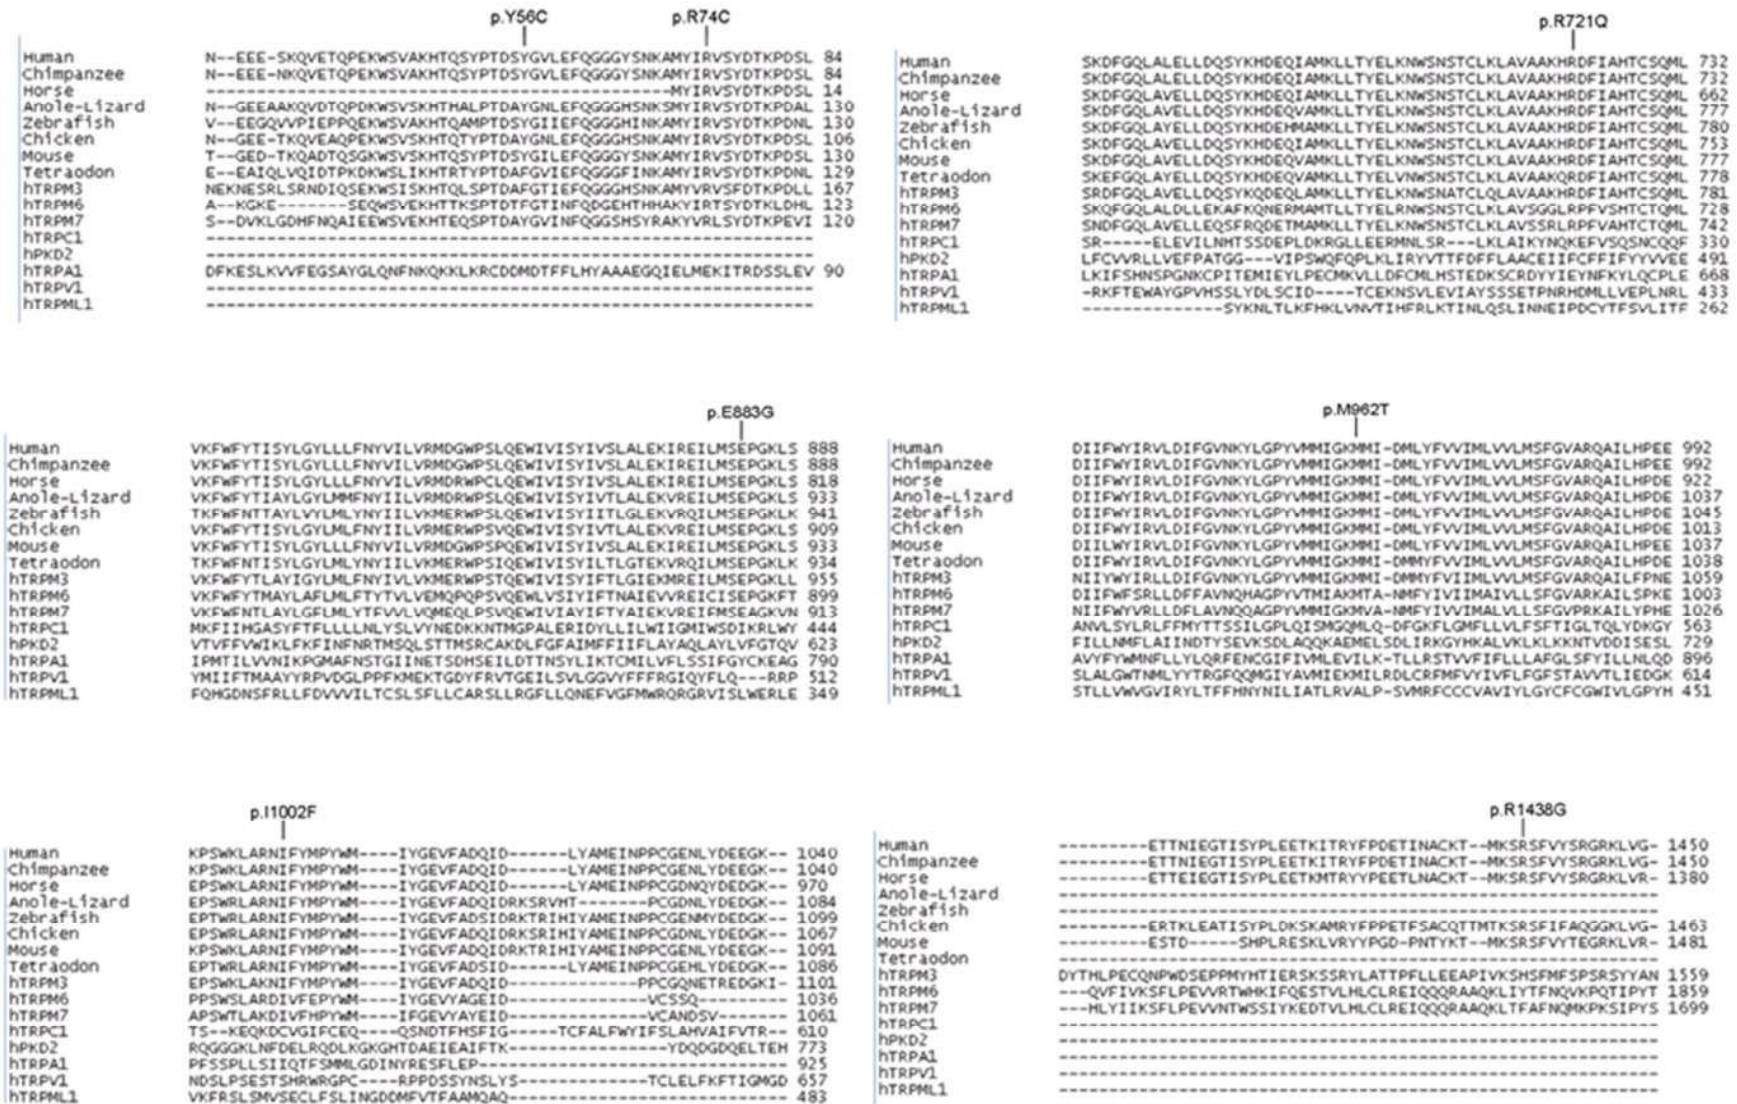

**Figure S2. Alignment of Novel Transcript of Human TRPM1 with other Vertebrate Species**

```

Anole-Lizard -----GLLRMNGFFKRNLSKGSASGSQKGQKAWIDKTFKRECIYIIANSKDATR
Chicken*   MKGRGGKFTGSLRRMSSSEFKRTSEKGSASGSQKGQKAWIEKTFKRECIYVIANNKDISR
Human      -----MSSFKRGLSKSSTSGSQKSGQKSWIEKTFCKRECIFVIPSMKDSNR
Mouse     -----MGSMRKMSSSFKRGSIKSSTSGSQKGQKAWIEKTFCKRECIFVIPSTKDPNR
Tetraodon -----IMDPKGPAAFKRSSLKRSTSGSQKAQKVWIERNFLKRECIHIFP-TKDPTR
Zebrafish  -----FGAKKAKEGSFKRASIKRTSSGSQKAQRAWIERTFLKRECNHIFP-SKEPNK
           . *** *: * ::***** *: **::* ***** :... *: :

Anole-Lizard CCGGQLLTQHTPIPAITTTNKNGEAAKQVDTQPKWSVSKHTHALPTDAYGNLEFQGGG
Chicken*   CCGGQLITQHIPPSTTANKGE-ETKQVEAQPEKWSVSKHTQTYPTDAYGNLEFQGGG
Human      CCGGQFTNQHIPPLPSATPSKNEE-ESKOVETOPEKWSVAKHTQSYPTDSYGVLEFQGGG
Mouse     CCGGQLTNQHIPPSPGAPSTTGE-DTKQADTQSGKWSVSKHTQSYPTDSYGILEFQGGG
Tetraodon CACGQLTTQHVAIPPGAN-SVEEAIQLVQIDTPKDKWSLIKHTRTYPTDAFGVIEFQGGG
Zebrafish  CCGGQLVNQHVAILPGSTNKNVEEGQVPIEPPQEKWSVAKHTQAMPPTDSYGIIEFQGGG
           *.***: .** . . . . . :. ***: ***: ***:* :*****

Anole-Lizard HSNKSMYIRVSYDTKPDALLHLMVKWQLELPKLLISVHGGLQNFELQPKLKQVFGKGLI
Chicken*   HSNKAMYIRVSYDTKPDSLLHLMVKDWQLELPKLLISVHGGLQNFEMQPKLKQVFGKGLI
Human      YSNKAMYIRVSYDTKPDSLLHLMVKDWQLELPKLLISVHGGLQNFEMQPKLKQVFGKGLI
Mouse     YSNKAMYIRVSYDTKPDSLLHLMVKDWQLELPKLLISVHGGLQSFEMQPKLKQVFGKGLI
Tetraodon FINKAMYIRVSYDTKPDNLLHLMVKDWQLELPLLISVHGGLQNFDLQPKLKQVFGKGLI
Zebrafish  HINKAMYIRVSYDTKPDNLLHLMVKDWQLELPLLISVHGGLQNFDLQPKLKQVFGKGLI
           . **.******.*****.*****.*****.*.:*****

Anole-Lizard KAAMTTGAWIFTGGVSTG--VIRHVGDAKDHSSKSRGRICAIGIAPWGIVENKEDLIGK
Chicken*   KAAMTTGAWIFTGGVSTG--VIRHVGDAKDHSSKSRGRICAIGIAPWGIVENKEDLIGK
Human      KAAMTTGAWIFTGGVSTG--VISHVGDALKDHSSKSRGRVCAIGIAPWGIVENKEDLVGK
Mouse     KAAMTTGAWIFTGGVSTG--VVSHVGDALKDHSSKSRGRLCAIGIAPWGMVENKEDLIGK
Tetraodon KAAVTTGAWIFTGGVNTAPGVIRHVGDAKDHSSKSRGKVCCAIGIAPWGIENKEDLIGK
Zebrafish  KAAVTTGAWIFTGGVSTG--VIRHVGDAKDHSSKSRGKVCCAIGIAPWGIVENKEDLIGR
           ***:*****.*. *: *****:*****:*****:*****:

```

Exon1a is shown in the square, and is highly conserved within diverse vertebrate species. \*All sequences were from cDNA sequences apart from chicken which was derived from a BLAT interrogation of *Gallus gallus* genomic sequence (NW\_001471425).

**Table S1. Sequence of the Mutation Screening Primers**

| exon  | sense                           | anti-sense                        | product size (bp) |
|-------|---------------------------------|-----------------------------------|-------------------|
| 1a    | CCAGACGCCCAAATCCTTCCCATT        | GCCCCATGCCACCCAGCACAGTTT          | 584               |
| 1     | CTCAATTATGCAAACCCTGCTGACATT     | GCACCTGAGTTTGTCCACGCTTGAGTTT      | 466               |
| 2     | GGGCAGACATATTGTTTTATAAAGGTAT    | CCTTCTGGACTCCTCTTTCTGCCTCTTA      | 279               |
| 3     | GGGAAAGGGGGAGATTGTTGTAGAAA      | GCCACAGCCATGAAGAAGACCAGGTAT       | 352               |
| 4     | GCCTCACTCCCCTTTGACACGAGAA       | CACAGTGAGTTCTGGGTGGTACATTGATTA    | 339               |
| 5     | GGGAATGTAGGGACTCAGGGCAAGT       | GGCTGCAAGGGAGCTCTTATTATTCTTA      | 335               |
| 6     | GGCAGGGTAGAGATGTGAGAATAAGTTTTA  | CCCAGGAGGACTGCGTGCCTTT            | 332               |
| 7     | CCAGATAGAACATCCCCAAGTCGTAAT     | GGAGATCTAGCAAATCTTCTGATTTAA       | 423               |
| 8     | CCTCCCACAGCAAAGTCTCAAATCAAA     | CCGGACTAAAATATGAATAACCCTGTCAT     | 334               |
| 9     | CCCCATATCTCCTTCTTGTTTTCAACTT    | CCAACATCAGAGGGACAGGAGTCACCAT      | 174               |
| 10    | CCAGGCGTGGAGTGAAAATCATT         | GGGAGAACAATACTAATAGGTCACCTGTACAAA | 217               |
| 11    | GCACATACAGAGGTGGGAGGGTCAAT      | GGTGGGACTGAAGCAAGGACAAGAA         | 352               |
| 12    | GGAATCTGGCGTTCGGAATACCCTTT      | GCACAATATGCACCAGTGACAAACACATT     | 313               |
| 13    | GGCCTCAAACACTACTGACCTCAAGTGAT   | CCTGTGCCTGGAATAATAACATTTTTGAAA    | 283               |
| 14    | CCACTTACCCCCTAGACGTGTGATGAA     | CTCTGAACCGGCCAAGTTGTTGAAAA        | 309               |
| 15    | GACAGAAGAAGAGTTTCTATATTAAGCACTT | GGGCTATGTATATTTGACCAGGATATTAT     | 267               |
| 16    | GGAGTGGAAATGTAAGATGTACTTCAGAA   | CCACCCCTCCCTGCAGAGACAAGTA         | 504               |
| 17    | GTCCTTGGTGGATATGCCTGTCTAAGAAA   | CCTCAGGGGGTTGCTAGAAGGAATAAAT      | 426               |
| 18-19 | GGGATAACATTCCAGGGCTCCTAGGTT     | CCAACATATCAAAGCATTCAAATATACTGAAT  | 640               |
| 20    | CCCAACACGGCTAACAGCTTGTCTTT      | CGCCTGGCCCAACATGCATAATTT          | 272               |
| 21    | GAATGTTCCATCAGTCTTATTGTTCCAA    | CCCAAGGCCTGTTCTTATGTCCTAACTA      | 414               |
| 22    | CCCACAAGCCAAGACAGTGAGAGACAAA    | GCCTCAGAAGCAGGGAAGAGAATCTTA       | 265               |
| 23    | CCTCCCCTCCTGTCAAACAAAACAAA      | CTGGCACCAAAAAACAAGAGAAGTATTT      | 201               |
| 24    | GCTGGGGCTACAGAGTTTATTTTTT       | CTGCAAAAATTGGATCTACTTAAAAACCCTAAT | 446               |
| 25    | GGCCATCTCATTGAGTATTTTCACTTAAAT  | CACACGAGCAAGTAGTTGAGTGAGATTT      | 409               |
| 26    | GGAGTGGCGGAGAAGAGAGCTTAATTTAA   | CAGGAGAACTCGGAGTGCATGTTTAAAT      | 356               |
| 27    | GGGGATTGTGAAGCTTGTAATATACTCAAA  | CCTGTCCATGTATCACATCTGTTTTAT       | 751               |
| 27-1a | GGAAGATGATGAAAGACAGACAGACTCTAA  | GACACCCATTAGTGGTTCTGACTGTTAAA     | 782               |

Genomic DNA for each individual was extracted from peripheral blood leukocytes using Gentra® Puregene Blood Kit (Qiagen, Duesseldorf, Germany). 192 European Collection of Cell Cultures (ECACC) DNA samples, derived from anonymised UK blood

donors was used as controls. PCR primers were designed to amplify each coding exon with flanking intron sequence. PCRs were setup using MolTaq polymerase Kit according to manufacturer's instruction (Molzym, Bremen, Germany). Briefly, 3.0µl of 10x PCR buffer, 0.6µl of 10mM dNTP mix, 0.6µl of each 10µM primer, 0.3µl of PCR Enhancer and 1.5units of MolTaq was added to molecular grade water into a final volume of 30µl. PCR cycles were as follows: denaturation at 94°C for 3 minutes, then cycled: denaturation at 94°C for 1 minute, annealing at 58°C for 30 seconds and extension at 72°C for 30 seconds. A final extension was carried out for 10 minutes at 72°C. All amplimers were purified using Multiscreen µ96 PCR clean up kit (Millpore, Billerica, MA). Subsequent sequencing reactions were setup using BigDye Terminator v3.1 sequencing kit and run on an automated capillary sequencer ABI3730 (Applied Biosystem, Forster City, CA). Electropherograms were analyzed using the "Seqman Pro" alignment algorithm (DNASTAR, Madison,WI). The pathogenic impact of the *TRPM1* sequence variants caused by non-synonymous changes of the protein sequence was evaluated through SIFT and PolyPhen sequence homology-based programs.

**Table S2. Primer Sequences for RACE and RT-PCR**

| RACE and RT-PCR Primers     |                                 |
|-----------------------------|---------------------------------|
| 1aF1                        | ACCAAAAGCCAGCACATGCTCCTCCTA     |
| 1aF2                        | CCCAGGGGAGTCAGCAGGGTGGCTCACA    |
| 1F1                         | GCCTGAGCTGTGCCCTCTCCATT         |
| 1F2                         | GCCCTGGCCAAGGAGGAGGCTGAAA       |
| 1F3                         | GCTCCTCATGGGGACTGCTCCTCTTAAA    |
| 3R                          | GGCTGAGTCTCCACCTGTTTGCTTTCCTCTT |
| 6R                          | CAGGATGAAGTGGGTGTGGGAGTTGTT     |
| TRPM1-27R                   | CCTGTCCATGTATCACATCTGTTTTAT     |
| GeneRacer™ 5' Primer        | CGACTGGAGCACGAGGACACTGA         |
| GeneRacer™ 5' Nested Primer | GGACACTGACATGGACTGAAGGAGTA      |
| TRPM1 5'GSP-REV             | GGAGCAGTGAGTCTGGCTTGGTGTGCATA   |
| TRRM1 5'GSP-nested          | GGCAGAGGGGGGATATGCTGGTTGGTGAA   |
| TRPM1 3'GSP-FOR             | CCCAGATGGCAGTCACCTTGCAGTAGAT    |
| TRPM1 3'GSP-nested          | CCTCGAATCCCTCGCTTGTCCCTAA       |
| GeneRacer™ 3' Primer        | GCTGTCAACGATACGCTACGTAACG       |
| GeneRacer™ 3' Nested Primer | CGCTACGTAACGGCATGACAGTG         |

5' and 3' RACE experiments were performed using the protocol supplied by the GeneRacer™ Kit manufacturer (Invitrogen, Carlsbad, CA). Primers were designed on the basis of previous published reference sequence for *TRPM1* (NM\_002420.4). Typically 1µg total RNA from both the retina (Clontech, Mountain View, CA) and total skin RNA (Stratagene, La Jolla, CA) were used as template. For 5'RACE, a *TRPM1* gene-specific primer TRPM1 5'GSP-REV was used together with GeneRacer™(Invitrogen, Carlsbad, CA) primers to capture mRNA 5' ends. All PCR reactions were setup using Platinum® Taq

DNA polymerase High Fidelity (Invitrogen, Carlsbad, CA) according to the GeneRacer Kit instructions. The PCR conditions were: 94°C for 2 minutes followed by 5 cycles of 94°C for 30 seconds, 72°C for 2 minutes, 5 cycles of 94°C for 30 seconds, 70°C for 2 minutes, followed by 20 cycles of 94°C for 30 seconds, 68°C for 30 seconds and 72°C for 2 minutes. Nested-PCR was performed on this cDNA resource using the GeneRacer™ 5' Nested Forward primer (Invitrogen, Carlsbad, CA) and the TRPM1 5'GSP-nested primer (table S2). PCR cycles for the nested reactions were as follows: 94°C for 2 minutes, followed by 25 cycles of 94°C for 30 seconds, 65°C for 30 seconds and 68°C for 2 minutes, finally 68°C for 10 minutes. For 3'RACE, two reverse transcription modules were tested to prime the first-strand cDNA synthesis, SuperScript™ III RT Module and Cloned AMV RT Module (Invitrogen, Carlsbad, CA). One contained a GeneRacer™ Oligo dT Primer with a dT tail of 24 nucleotides. A second GeneRacer™ Oligo dT Primer had a dT tail of 18 nucleotides. The SuperScript™ III RT Module was used for 3'RACE experiment. Two rounds of PCR for 3'RACE were setup using the conditions as described for the 5'RACE PCR experiment, with the gene-specific forward primer: TRPM1 3'GSP-FOR and a nested gene-specific forward primer: TRPM1 3'GSP-nested. PCR products were purified from the gel using the QIAGEN Gel extraction Kit (Qiagen, Duesseldorf, Germany) and cloned into pCR4-TOPO vector (Invitrogen, Carlsbad, CA). DNA mini-preparations from different clones were purified using Qiaprep® Miniprep kit (Qiagen, Duesseldorf, Germany). Sanger sequencing reactions were performed on the ABI sequencing system as previously described. RT-PCRs described in figure 5 (main text), were performed using a primer complimentary to exon 27 (TRPM1 27R – table S2), SuperScript™ III reverse-transcriptase and 1.0µg of retinal or skin RNA for cDNA synthesis. Reaction setup was as follows: 1µg of total RNA, 2µM of primer TRPM1-27R, 1µl of dNTP mix (10mM), 7µl of DEPC-treated water to total of 10µl. The mixture was incubated at 65°C for 5 minutes,

then placed on ice for 2 minutes. The following cDNA Synthesis Mix was added to each RNA/primer mixture: 10X RT buffer 2 $\mu$ l, 4 $\mu$ l of 25 mM MgCl<sub>2</sub>, 2 $\mu$ l of 0.1 M DTT, 1 $\mu$ l of RNaseOUT™ (40 U/ $\mu$ l), 1 $\mu$ l of SuperScript™ III RT (200U/ $\mu$ l). The mixed reaction was incubated at 50°C for 50 minutes, terminated at 85°C for 5 minutes, and chilled on ice. Then, 1 $\mu$ l of RNase H (2U/ $\mu$ l) was added to each tube and incubated for 20 min at 37°C. The cDNA was used as template for the ensuing PCRs. PCR cycles using the primer pairs as described in Figure 5 (main text) were as follows: denaturation at 94°C 3 minutes, 5 cycles of 94°C for 30 seconds and 72°C 1 minute, 5 cycles of 94°C for 30 seconds and 70°C 1 minute, followed by 25 cycles at 94°C for 1 minute, 58°C-64°C for 30 seconds and 72°C for 1 minute, with a final extension of 10 minutes at 72°C. The PCR for confirming the existence of exon 1a in a full length TRPM1 transcript used primer pair 1aF1 and TRPM1-27R, and cycles were as follows: 94°C 3 minutes, 5 cycles of 94°C for 30 seconds and 72°C 6 minutes, 5 cycles of 94°C for 30 seconds and 70°C 6 minutes, followed by 25 cycles at 94°C for 1 minute, 64°C for 30 seconds and 72°C for 6 minute, with a final extension of 10 minutes at 72°C
